# Supplementary material for: Risk Scoring System to Assess Outcomes in Patients Treated with Contemporary Guideline-Adherent Optimal Therapies after Acute Myocardial Infarction
Source: PubMed Central journal article supplement — Korean Circ J. 2018 Mar 12;48(6):492–504. doi: 10.4070/kcj.2017.0128 (PMC5986748; doi:10.4070/kcj.2017.0128), 2018-03-12
Supplement: kcj-48-492-s001.pdf [file kcj-48-492-s001.pdf]

**Supplementary Material 1.** The Global Registry of Acute Coronary Events (GRACE) 6-month post-discharge prediction model

The primary end point was all-cause mortality occurring within 6 months of discharge from hospital. Nine multivariate predictors of mortality were identified (**Table**). **Figure** illustrates a method to estimate a patient's risk depending on the total score obtained by summing the individual scores for each of the 9 variables in the model.

**Table.** Multivariate predictors for the 6-month postdischarge mortality model

| Predictors                                           | $\chi^2$ | HR (95% CI)                      |                                |                                     |
|------------------------------------------------------|----------|----------------------------------|--------------------------------|-------------------------------------|
|                                                      |          | Development cohort<br>(n=15,007) | Validation cohort<br>(n=7,638) | All patients with<br>ACS (n=22,645) |
| Age per 10-year increase                             | 228.6    | 1.8 (1.64–1.91)                  | 1.7 (1.48–1.86)                | 1.7 (1.63–1.84)                     |
| History of myocardial infarction                     | 22.0     | 1.5 (1.26–1.75)                  | 1.2 (0.88–1.50)                | 1.4 (1.20–1.59)                     |
| History of congestive heart failure                  | 66.5     | 2.2 (1.79–2.59)                  | 2.0 (1.50–2.70)                | 2.1 (1.80–2.47)                     |
| Pulse per 30/min increase                            | 28.8     | 1.3 (1.16–1.43)                  | 1.4 (1.20–1.66)                | 1.3 (1.23–1.47)                     |
| Systolic blood pressure per 20-mmHg decrease         | 21.5     | 1.1 (1.08–1.20)                  | 1.0 (0.92–1.19)                | 1.1 (1.06–1.17)                     |
| Initial serum creatinine level per 1-mg/dL increase* | 28.1     | 1.2 (1.11–1.24)                  | 1.2 (1.10–1.30)                | 1.2 (1.12–1.23)                     |
| Initial cardiac enzyme elevation*                    | 33.3     | 1.6 (1.39–1.89)                  | 1.5 (1.20–1.99)                | 1.5 (1.33–1.79)                     |
| ST-segment depression                                | 19.2     | 1.4 (1.22–1.69)                  | 1.6 (1.25–2.05)                | 1.5 (1.29–1.69)                     |
| No in-hospital PCI                                   | 14.8     | 1.6 (1.24–1.96)                  | 1.5 (1.11–2.11)                | 1.9 (1.30–1.88)                     |
| C statistic                                          |          | 0.81                             | 0.75                           | 0.77                                |

ACS = acute myocardial infarction; CI = confidence interval; HR = hazard ratio; PCI = percutaneous coronary intervention.

\*Value of the first serum creatinine or cardiac enzyme drawn following presentation to hospital for the acute event.

### Risk Calculator for 6-Month Postdischarge Mortality After Hospitalization for Acute Coronary Syndrome

Record the points for each variable at the bottom left and sum the points to calculate the total risk score. Find the total score on the x-axis of the nomogram plot. The corresponding probability on the y-axis is the estimated probability of all-cause mortality from hospital discharge to 6 months.

| Medical History                       |        | Findings at Initial Hospital Presentation |        | Findings During Hospitalization                     |        |
|---------------------------------------|--------|-------------------------------------------|--------|-----------------------------------------------------|--------|
| ① Age in Years                        | Points | ④ Resting Heart Rate, beats/min           | Points | ⑦ Initial Serum Creatinine, mg/dL                   | Points |
| ≤29                                   | 0      | ≤49.9                                     | 0      | 0–0.39                                              | 1      |
| 30–39                                 | 0      | 50–69.9                                   | 3      | 0.4–0.79                                            | 3      |
| 40–49                                 | 18     | 70–89.9                                   | 9      | 0.8–1.19                                            | 5      |
| 50–59                                 | 36     | 90–109.9                                  | 14     | 1.2–1.59                                            | 7      |
| 60–69                                 | 55     | 110–149.9                                 | 23     | 1.6–1.99                                            | 9      |
| 70–79                                 | 73     | 150–199.9                                 | 35     | 2–3.99                                              | 15     |
| 80–89                                 | 91     | ≥200                                      | 43     | ≥4                                                  | 20     |
| ≥90                                   | 100    |                                           |        |                                                     |        |
| ② History of Congestive Heart Failure | 24     | ⑤ Systolic Blood Pressure, mm Hg          |        | ⑧ Elevated Cardiac Enzymes                          | 15     |
| ③ History of Myocardial Infarction    | 12     | ≤79.9                                     | 24     | ⑨ No In-Hospital Percutaneous Coronary Intervention | 14     |
|                                       |        | 80–99.9                                   | 22     |                                                     |        |
|                                       |        | 100–119.9                                 | 18     |                                                     |        |
|                                       |        | 120–139.9                                 | 14     |                                                     |        |
|                                       |        | 140–159.9                                 | 10     |                                                     |        |
|                                       |        | 160–199.9                                 | 4      |                                                     |        |
|                                       |        | ≥200                                      | 0      |                                                     |        |
|                                       |        |                                           | 1      |                                                     |        |
|                                       |        | ⑥ ST-Segment Depression                   | 11     |                                                     |        |

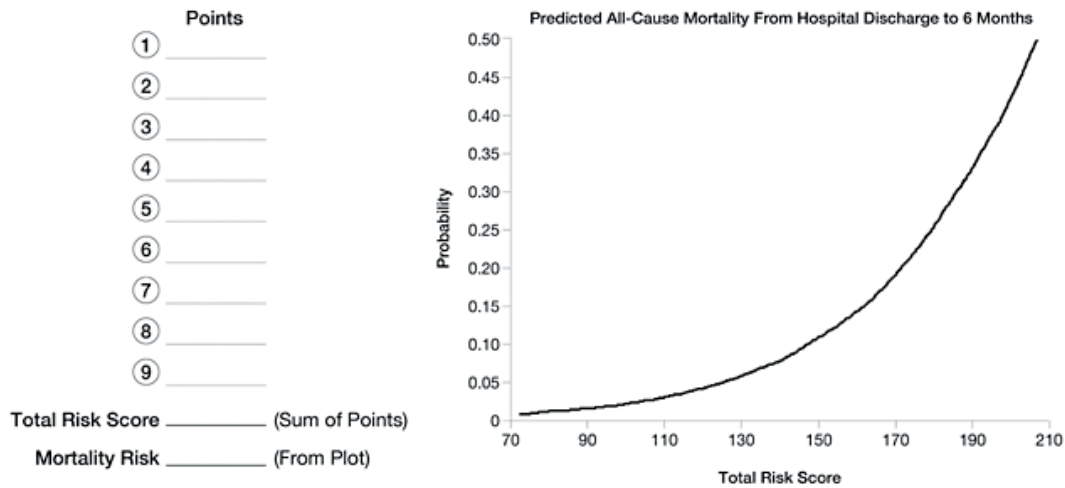

**Figure.** GRACE prediction score card and nomogram for all-cause mortality from discharge to 6 months.

GRACE = Global Registry of Acute Coronary Events.
