# Supplementary material for: Risk Scoring System to Assess Outcomes in Patients Treated with Contemporary Guideline-Adherent Optimal Therapies after Acute Myocardial Infarction
Source: PubMed Central journal article supplement — Korean Circ J. 2018 Mar 12;48(6):492–504. doi: 10.4070/kcj.2017.0128 (PMC5986748; doi:10.4070/kcj.2017.0128), 2018-03-12
Supplement: kcj-48-492-s002.pdf [file kcj-48-492-s002.pdf]

## Supplementary Material 2. Assessment of Pexelizumab in Acute Myocardial Infarction

(APEX AMI) score

The final model included 7 factors (age, systolic blood pressure, Killip class, heart rate, serum creatinine, sum of baseline total ST deviation, and anterior location of myocardial infarction [MI]) (Table). Figure provides an algorithm and demonstrates how to estimate risk of 90-day death in a hypothetical patient.

**Table.** Independent correlates of 90-day death in descending order of their  $\chi^2$  value, taking bootstrapping results into account

| Variables                                                          | Adjusted $\chi^2$ | HR   | 95% CI    |
|--------------------------------------------------------------------|-------------------|------|-----------|
| Age, per increments of 10 years                                    | 117.1             | 2.03 | 1.80–2.29 |
| Systolic BP, per increments of 10 mmHg                             | 50.5              | 0.86 | 0.82–0.90 |
| Killip class 3 or 4 (vs. 1 or 2)                                   | 49.9              | 4.24 | 2.97–6.08 |
| Heart rate >70 to <110 bpm per increments of 10 bpm                | 49.1              | 1.45 | 1.31–1.59 |
| Heart rate $\leq$ 70 bpm per increments of 10 bpm                  | 0.5               | 1.04 | 0.83–1.31 |
| Creatinine, >90 $\mu$ mol/L per increments of 10 $\mu$ mol/L       | 21.6              | 1.23 | 1.13–1.34 |
| Creatinine, $\leq$ 90 $\mu$ mol/L per increments of 10 $\mu$ mol/L | 0.5               | 1.05 | 0.92–1.19 |
| Total ST deviation at baseline per increments of 10 mm             | 13.6              | 1.25 | 1.11–1.40 |
| Anterior MI location (vs. other)                                   | 9.2               | 1.47 | 1.12–1.93 |

C-index, 0.81. Heart rate was a linear spline with increasing risk from 0 to 70 bpm, greater increase in risk for increasing values from 70 to 110 bpm, and the same risk for all values >110 bpm. Serum creatinine was a linear variable with increasing risk from  $\geq$ 90  $\mu$ mol/L and the same risk for all values <90.

BP = blood pressure; bpm = beats per minute; CI = confidence interval; HR = hazard ratio; MI = myocardial infarction.

**A**

| Systolic BP | Score | Heart Rate | Score | Age   | Score | Creatinine | Score | total ST Deviation | Score |
|-------------|-------|------------|-------|-------|-------|------------|-------|--------------------|-------|
| <=80        | 29    | <40        | 0     | <=35  | 0     | <=30       | 0     | <10                | 0     |
| 80-100      | 19    | 40-50      | 2     | 35-45 | 13    | 30-60      | 3     | 10-20              | 5     |
| 100-120     | 8     | 50-60      | 4     | 45-55 | 27    | 60-90      | 6     | 20-30              | 9     |
| >=120       | 0     | 60-70      | 6     | 55-65 | 40    | 90-120     | 19    | 30-40              | 14    |
|             |       | 70-80      | 7     | 65-75 | 53    | 120-150    | 33    | 40-50              | 19    |
|             |       | 80-90      | 15    | 75-85 | 66    | 150-180    | 46    | 50-60              | 23    |
|             |       | 90-100     | 23    | >85   | 73    | 180-210    | 60    | 60-70              | 28    |
|             |       | 100-110    | 30    |       |       | 210-240    | 73    | >70                | 33    |
|             |       | >=110      | 38    |       |       | 240-270    | 87    |                    |       |
|             |       |            |       |       |       | >270       | 100   |                    |       |
| +           | _____ | +          | _____ | +     | _____ | +          | _____ | +                  | _____ |

Add the total number of points for Clinical Evaluation from the above table: \_\_\_\_\_

| Baseline Risk Factors                       | Score |
|---------------------------------------------|-------|
| Killip Class III/IV                         | 30    |
| Anterior MI                                 | 9     |
| <b>Total From Clinical Evaluation Table</b> |       |
| <b>TOTAL SCORE</b>                          | _____ |

**B**

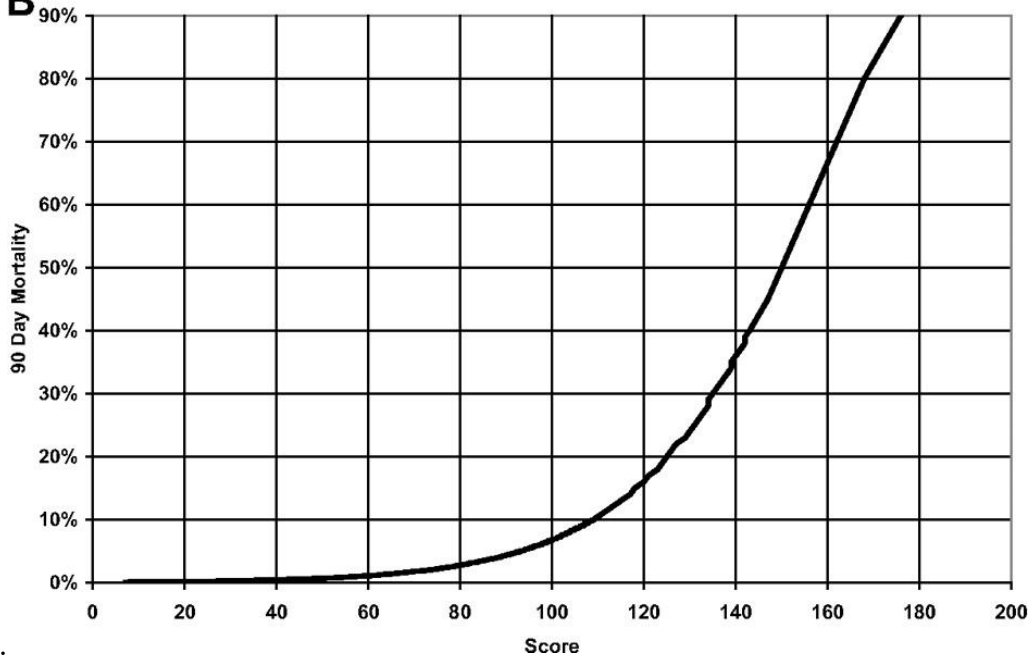

**Figure.** APEX AMI mortality risk model nomogram. Clinical evaluation scores (A). Predicted rate of 90-day mortality by nomogram score (B).

APEX AMI = Assessment of Pexelizumab in Acute Myocardial Infarction; BP = blood pressure; MI = myocardial infarction.
