# Supplementary material for: Risk Scoring System to Assess Outcomes in Patients Treated with Contemporary Guideline-Adherent Optimal Therapies after Acute Myocardial Infarction
Source: PubMed Central journal article supplement — Korean Circ J. 2018 Mar 12;48(6):492–504. doi: 10.4070/kcj.2017.0128 (PMC5986748; doi:10.4070/kcj.2017.0128), 2018-03-12
Supplement: kcj-48-492-s003.pdf [file kcj-48-492-s003.pdf]

**Supplementary Material 3.** Controlled Abciximab and Device Investigation to Lower Late Angioplasty Complications (CADILLAC) score

Seven variables selected from the initial multivariate model were weighted proportionally to their respective odds ratio for 1-year mortality (age >65 years [2 points], Killip class 2/3 [3 points], baseline left ventricular (LV) ejection fraction <40% [4 points], anemia [2 points], renal insufficiency [3 points], triple-vessel disease [2 points], and post-procedural thrombolysis in myocardial infarction (MI) flow grade [2 points]). The observed rates of 1-year mortality according to this scoring system are shown in **Figure**.

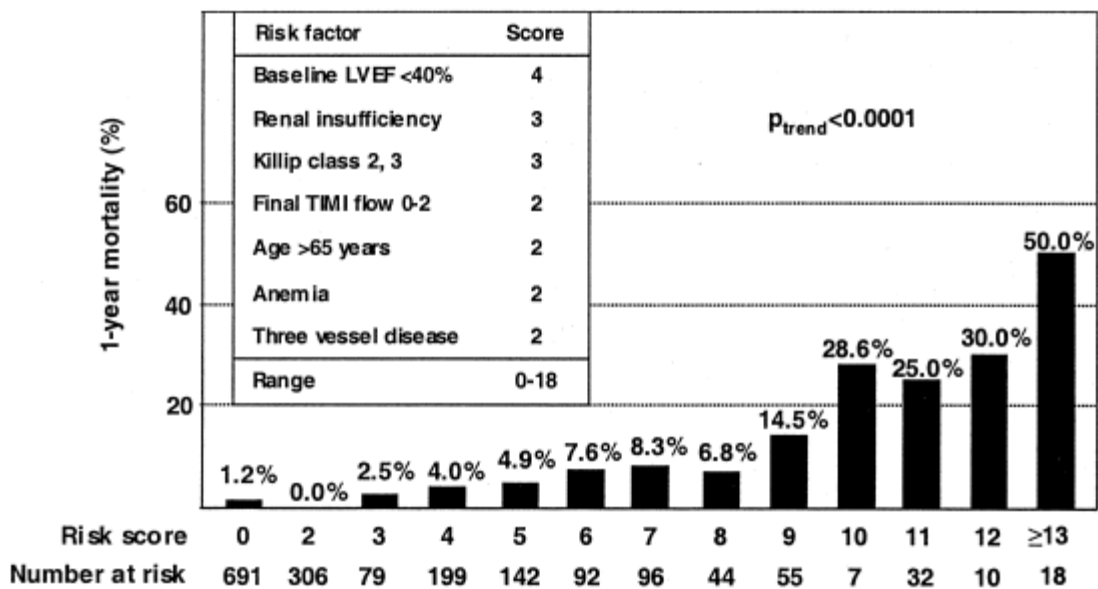

**Figure.** Integer scoring system and corresponding 1-year mortality rates. LVEF, left ventricular ejection fraction.
